# Supplementary material
Source: PubMed Central journal article supplement (PMC2254212)
Supplement: NIHMS38864-supplement-01.pdf [file NIHMS38864-supplement-01.pdf]

**Table 2 (Supplementary information)**

| <b>YPD1/SLN1-R1 Intermolecular Contacts</b>         |           |                                              |           |
|-----------------------------------------------------|-----------|----------------------------------------------|-----------|
| Apo complex                                         |           | BeF <sub>3</sub> <sup>-</sup> -bound complex |           |
| YPD1                                                | SLN1-R1   | YPD1                                         | SLN1-R1   |
| <i>A. Conserved Hydrophobic Interactions</i>        |           |                                              |           |
| I13                                                 | P1196     | I13                                          | P1196     |
| M20                                                 | R1105     | M20                                          | R1105     |
| M20                                                 | M1106     | M20                                          | M1106     |
| M20                                                 | L1109     | M20                                          | L1109     |
| F27                                                 | R1105     | F27                                          | R1105     |
| L31                                                 | V1102     | L31                                          | V1102     |
| Q34                                                 | V1098     | Q34                                          | V1098     |
| H64                                                 | N1146     | H64                                          | N1146     |
| F65                                                 | N1096     | F65                                          | N1096     |
| G68                                                 | N1099     | G68                                          | N1099     |
| S69                                                 | V1098     | S69                                          | V1098     |
| A71                                                 | P1196     | A71                                          | P1196     |
| <i>B. Unique Hydrophobic Interactions</i>           |           |                                              |           |
| I17                                                 | V1102     | T12                                          | K1198     |
| A72                                                 | P1196     | E16                                          | K1198     |
| A72                                                 | V1102     | L31                                          | E1101     |
| E83                                                 | F1175     | Q34                                          | H1097     |
|                                                     |           | Q34                                          | A1174     |
|                                                     |           | Q34                                          | F1175     |
|                                                     |           | F65                                          | D1095     |
|                                                     |           | K67                                          | A1174     |
|                                                     |           | G68                                          | A1174     |
|                                                     |           | S69                                          | N1096     |
|                                                     |           | S69                                          | N1099     |
|                                                     |           | A72                                          | N1099     |
|                                                     |           | Q86                                          | N1146     |
|                                                     |           | Q86                                          | F1175     |
| <i>C. Conserved Hydrogen Bond Interactions</i>      |           |                                              |           |
| E16 OE2                                             | R1199 N   | E16 OE2                                      | R1199 N   |
| M20 O                                               | R1105 NH2 | M20 O                                        | R1105 NH2 |
| Q38 OE1                                             | N1096 ND2 | Q38 OE1                                      | N1096 ND2 |
| Q38 NE2                                             | N1096 OD1 | Q38 NE2                                      | N1096 OD1 |
| D60 OD1                                             | N1146 NE2 | D60 OD1                                      | N1146 NE2 |
| F65 O                                               | N1096 ND2 | F65 O                                        | N1096 ND2 |
| G68 O                                               | N1099 ND2 | G68 O                                        | N1099 ND2 |
| R90 NH2                                             | N1146 OE1 | R90 NH2                                      | N1146 OE1 |
| <i>D. Unique Hydrogen Bond Interactions</i>         |           |                                              |           |
| Q34 NE2                                             | E1101 OE2 | N61 OD1                                      | N1146 NE2 |
| Q34 OE1                                             | I1197 ND1 | K67 NZ                                       | A1174 O   |
| H64 NE2                                             | D1095 OD2 |                                              |           |
| <i>E. Water-Mediated Hydrogen Bond Interactions</i> |           |                                              |           |
| H64                                                 | D1095     | N10                                          | K1198     |
| G68                                                 | N1099     | M20                                          | R1105     |
|                                                     |           | D26                                          | R1105     |
|                                                     |           | N61                                          | N1146     |
|                                                     |           | E83                                          | D1177     |
|                                                     |           | R90                                          | N1146     |
